# Supplementary material for: Obesity Modifies the Proteomic Profile of the Periodontal Ligament
Source: MDPI journal article supplement (doi:10.3390/ijms24021003), 2023-01-05
Supplement: s1 [file s1]

**Table S1** - List of differentially abundant proteins in PDL of the control and obese groups. Average peak area values of each group, p-values (*t*-test), and fold-change (obese / control) are shown.

| Accession                 | Description                                                                 | Protein Symbol | Peak area |           |           |                 |         |         |         |         |         |               | t-test | Fold-Change |
|---------------------------|-----------------------------------------------------------------------------|----------------|-----------|-----------|-----------|-----------------|---------|---------|---------|---------|---------|---------------|--------|-------------|
|                           |                                                                             |                | Control 1 | Control 2 | Control 3 | Control Average | Obese 1 | Obese 2 | Obese 3 | Obese 4 | Obese 5 | Obese Average |        |             |
| Up-regulated in Obesity   |                                                                             |                |           |           |           |                 |         |         |         |         |         |               |        |             |
| Q9EQP5                    | Prolargin                                                                   | Prelp          | 0.0E0     | 0.0E0     | 0.0E0     | 0.0E0           | 5.4E6   | 1.3E7   | 1.8E7   | 1.5E7   | 6.3E6   | 1.2E7         | 0.014  | 1.2E7       |
| Q4KLF8                    | Actin-related protein 2/3 complex subunit 5                                 | Arcp5          | 0.0E0     | 0.0E0     | 0.0E0     | 0.0E0           | 1.0E7   | 9.1E6   | 0.0E0   | 7.4E6   | 5.4E6   | 6.4E6         | 0.036  | 6.4E6       |
| I6L9G6                    | RCG31562, isoform CRA_c                                                     | I6l9g6         | 0.0E0     | 0.0E0     | 0.0E0     | 0.0E0           | 4.0E6   | 3.6E6   | 1.7E6   | 2.4E6   | 0.0E0   | 2.4E6         | 0.049  | 2.4E6       |
| Q9EPC6                    | Profilin-2                                                                  | Prof2          | 0.0E0     | 0.0E0     | 0.0E0     | 0.0E0           | 3.1E6   | 3.0E6   | 3.4E6   | 0.0E0   | 1.3E6   | 2.2E6         | 0.046  | 2.2E6       |
| A3FM27                    | Chloride intracellular channel protein                                      | A3fm27         | 0.0E0     | 0.0E0     | 0.0E0     | 0.0E0           | 1.4E6   | 1.5E6   | 1.4E6   | 2.6E6   | 0.0E0   | 1.4E6         | 0.043  | 1.4E6       |
| Q5XFW8                    | Protein SEC13 homolog                                                       | Sec13          | 0.0E0     | 2.2E6     | 0.0E0     | 7.4E5           | 2.7E6   | 5.9E6   | 5.0E6   | 6.2E6   | 3.0E6   | 4.6E6         | 0.014  | 6.1         |
| O35796                    | Complement component 1 Q subcomponent-binding protein, mitochondrial        | C1qbp          | 0.0E0     | 2.9E6     | 0.0E0     | 9.5E5           | 3.4E6   | 4.0E6   | 2.5E6   | 6.1E6   | 4.7E6   | 4.1E6         | 0.026  | 4.3         |
| P07895                    | Superoxide dismutase                                                        | Sod2           | 0.0E0     | 3.5E6     | 4.3E6     | 2.6E6           | 4.9E6   | 4.7E6   | 1.1E7   | 8.6E6   | 9.4E6   | 7.8E6         | 0.040  | 3.0         |
| P17764                    | Acetyl-CoA acetyltransferase, mitochondrial                                 | Thil           | 0.0E0     | 1.6E6     | 3.1E6     | 1.6E6           | 4.0E6   | 4.8E6   | 3.8E6   | 6.1E6   | 4.5E6   | 4.6E6         | 0.011  | 3.0         |
| P16975                    | SPARC                                                                       | Sprc           | 1.1E7     | 1.5E7     | 8.2E6     | 1.1E7           | 1.5E7   | 2.6E7   | 1.8E7   | 1.9E7   | 1.7E7   | 1.9E7         | 0.042  | 1.7         |
| Down-regulated in Obesity |                                                                             |                |           |           |           |                 |         |         |         |         |         |               |        |             |
| A0A0G2K0W9                | Proteasome subunit alpha type                                               | A0a0g2k0w9     | 4.4E6     | 4.8E6     | 3.4E6     | 4.2E6           | 3.3E6   | 2.9E6   | 3.2E6   | 3.6E6   | 2.2E6   | 3.0E6         | 0.037  | -1.4        |
| A0A0U1RRV7                | RCG61099, isoform CRA_b                                                     | A0a0u1rrv7     | 1.3E7     | 1.3E7     | 1.6E7     | 1.4E7           | 8.5E6   | 8.1E6   | 1.2E7   | 1.1E7   | 8.0E6   | 9.5E6         | 0.018  | -1.5        |
| M0RA26                    | Ribosomal protein S27-like                                                  | M0ra26         | 8.3E6     | 1.1E7     | 8.2E6     | 9.2E6           | 8.2E6   | 7.0E6   | 5.1E6   | 6.4E6   | 4.2E6   | 6.2E6         | 0.044  | -1.5        |
| D3ZWE0                    | Histone H2A                                                                 | D3zwe0         | 6.5E8     | 6.5E8     | 6.1E8     | 6.4E8           | 4.5E8   | 4.1E8   | 4.9E8   | 5.4E8   | 2.4E8   | 4.3E8         | 0.022  | -1.5        |
| P61805                    | Dolichyl-diphosphooligosaccharide--protein glycosyltransferase subunit DAD1 | Dad1           | 9.1E6     | 7.9E6     | 5.4E6     | 7.5E6           | 5.2E6   | 4.6E6   | 6.1E6   | 5.0E6   | 3.3E6   | 4.9E6         | 0.039  | -1.5        |
| A0A0G2K757                | Dolichyl-diphosphooligosaccharide--protein glycosyltransferase subunit 2    | A0a0g2k757     | 2.7E7     | 2.4E7     | 1.7E7     | 2.2E7           | 1.5E7   | 1.5E7   | 1.3E7   | 2.0E7   | 9.1E6   | 1.4E7         | 0.049  | -1.5        |

|            |                                                       |            |       |       |       |              |       |       |       |       |       |              |       |             |
|------------|-------------------------------------------------------|------------|-------|-------|-------|--------------|-------|-------|-------|-------|-------|--------------|-------|-------------|
| Q794E4     | Heterogeneous nuclear ribonucleoprotein F             | Hnrpf      | 1.8E7 | 1.9E7 | 1.5E7 | <b>1.7E7</b> | 1.4E7 | 9.5E6 | 1.1E7 | 9.9E6 | 1.1E7 | <b>1.1E7</b> | 0.002 | <b>-1.6</b> |
| Q68FP1     | Gelsolin                                              | Gels       | 6.9E7 | 6.7E7 | 4.3E7 | <b>6.0E7</b> | 4.2E7 | 4.4E7 | 3.3E7 | 4.2E7 | 2.5E7 | <b>3.7E7</b> | 0.028 | <b>-1.6</b> |
| F1M779     | Clathrin heavy chain                                  | F1m779     | 4.8E7 | 4.5E7 | 2.7E7 | <b>4.0E7</b> | 2.6E7 | 2.7E7 | 1.9E7 | 3.2E7 | 2.0E7 | <b>2.5E7</b> | 0.041 | <b>-1.6</b> |
| Q4V7D1     | Signal sequence receptor, alpha                       | Q4v7d1     | 2.1E7 | 2.5E7 | 1.7E7 | <b>2.1E7</b> | 1.8E7 | 1.1E7 | 1.2E7 | 1.4E7 | 7.8E6 | <b>1.3E7</b> | 0.026 | <b>-1.7</b> |
| Q6AXS5     | Plasminogen activator inhibitor 1 RNA-binding protein | Pairb      | 3.8E6 | 4.9E6 | 3.6E6 | <b>4.1E6</b> | 2.5E6 | 2.4E6 | 2.1E6 | 3.9E6 | 1.3E6 | <b>2.4E6</b> | 0.038 | <b>-1.7</b> |
| P62909     | 40S ribosomal protein S3                              | Rs3        | 5.0E7 | 4.3E7 | 3.4E7 | <b>4.2E7</b> | 2.8E7 | 2.8E7 | 2.4E7 | 2.7E7 | 1.5E7 | <b>2.4E7</b> | 0.009 | <b>-1.7</b> |
| P35427     | 60S ribosomal protein L13a                            | RI13a      | 1.9E7 | 2.3E7 | 1.4E7 | <b>1.9E7</b> | 1.1E7 | 1.2E7 | 9.5E6 | 1.3E7 | 7.3E6 | <b>1.1E7</b> | 0.019 | <b>-1.7</b> |
| F1LSW7     | 60S ribosomal protein L14                             | F1lsw7     | 2.9E7 | 2.8E7 | 1.9E7 | <b>2.5E7</b> | 1.7E7 | 1.4E7 | 1.3E7 | 2.0E7 | 7.7E6 | <b>1.4E7</b> | 0.025 | <b>-1.8</b> |
| P31000     | Vimentin                                              | Vime       | 5.2E8 | 6.5E8 | 4.3E8 | <b>5.3E8</b> | 2.8E8 | 2.8E8 | 2.6E8 | 4.6E8 | 2.3E8 | <b>3.0E8</b> | 0.019 | <b>-1.8</b> |
| A0A0G2JUA5 | AHNAK nucleoprotein                                   | A0a0g2jua5 | 2.0E8 | 2.0E8 | 9.5E7 | <b>1.6E8</b> | 1.1E8 | 8.1E7 | 8.6E7 | 1.2E8 | 6.7E7 | <b>9.3E7</b> | 0.047 | <b>-1.8</b> |
| Q6AY09     | Heterogeneous nuclear ribonucleoprotein H2            | Hnrh2      | 2.1E7 | 2.7E7 | 2.0E7 | <b>2.3E7</b> | 1.4E7 | 1.5E7 | 1.7E7 | 1.1E7 | 6.9E6 | <b>1.3E7</b> | 0.013 | <b>-1.8</b> |
| Q63030     | Rat alpha-smooth muscle actin mRNA (Fragment)         | Q63030     | 1.6E9 | 2.0E9 | 1.0E9 | <b>1.5E9</b> | 1.1E9 | 8.2E8 | 7.5E8 | 9.9E8 | 5.4E8 | <b>8.4E8</b> | 0.030 | <b>-1.8</b> |
| Q5PQK2     | FUS RNA-binding protein                               | Q5pqk2     | 6.9E6 | 8.2E6 | 5.0E6 | <b>6.7E6</b> | 4.2E6 | 3.3E6 | 3.9E6 | 4.2E6 | 2.9E6 | <b>3.7E6</b> | 0.008 | <b>-1.8</b> |
| Q66H80     | Coatomer subunit delta                                | Copd       | 8.2E6 | 8.1E6 | 4.7E6 | <b>7.0E6</b> | 3.6E6 | 4.3E6 | 3.5E6 | 5.3E6 | 2.6E6 | <b>3.9E6</b> | 0.022 | <b>-1.8</b> |
| Q6PDU1     | Serine/arginine-rich splicing factor 2                | Srsf2      | 1.6E7 | 1.5E7 | 1.2E7 | <b>1.4E7</b> | 8.3E6 | 8.3E6 | 6.2E6 | 1.1E7 | 4.9E6 | <b>7.8E6</b> | 0.009 | <b>-1.8</b> |
| A0A0G2JSH9 | Peroxiredoxin-2                                       | A0a0g2jsh9 | 3.3E7 | 3.5E7 | 1.8E7 | <b>2.9E7</b> | 1.6E7 | 1.2E7 | 1.7E7 | 2.4E7 | 9.7E6 | <b>1.6E7</b> | 0.040 | <b>-1.8</b> |
| Q9EPB1     | Dipeptidyl peptidase 2                                | Dpp2       | 3.4E7 | 3.1E7 | 1.8E7 | <b>2.8E7</b> | 1.8E7 | 2.1E7 | 1.4E7 | 1.7E7 | 5.0E6 | <b>1.5E7</b> | 0.048 | <b>-1.8</b> |
| A0A0G2JTG7 | Heterogeneous nuclear ribonucleoprotein H             | A0a0g2jtg7 | 2.4E7 | 3.1E7 | 1.7E7 | <b>2.4E7</b> | 1.5E7 | 1.3E7 | 1.7E7 | 1.2E7 | 6.9E6 | <b>1.3E7</b> | 0.027 | <b>-1.8</b> |
| F1LNF1     | Heterogeneous nuclear ribonucleoproteins A2/B1        | F1lnf1     | 8.0E7 | 7.7E7 | 5.3E7 | <b>7.0E7</b> | 3.3E7 | 3.6E7 | 3.6E7 | 6.4E7 | 2.0E7 | <b>3.8E7</b> | 0.029 | <b>-1.9</b> |
| P29975     | Aquaporin-1                                           | Aqp1       | 1.6E7 | 2.2E7 | 9.9E6 | <b>1.6E7</b> | 7.5E6 | 7.9E6 | 9.5E6 | 1.2E7 | 5.2E6 | <b>8.5E6</b> | 0.049 | <b>-1.9</b> |
| F1M7X3     | Cadherin 13                                           | F1m7x3     | 1.2E7 | 1.2E7 | 9.5E6 | <b>1.1E7</b> | 8.1E6 | 4.2E6 | 6.7E6 | 5.7E6 | 4.5E6 | <b>5.9E6</b> | 0.004 | <b>-1.9</b> |
| A0A0H2UHT6 | Ribosomal protein S18                                 | A0a0h2uht6 | 4.2E7 | 3.9E7 | 2.7E7 | <b>3.6E7</b> | 1.7E7 | 2.0E7 | 1.4E7 | 3.0E7 | 1.3E7 | <b>1.9E7</b> | 0.018 | <b>-1.9</b> |
| Q3KRF2     | High density lipoprotein binding protein (Vigilin)    | Q3krf2     | 1.8E7 | 1.8E7 | 1.1E7 | <b>1.6E7</b> | 7.1E6 | 8.2E6 | 7.1E6 | 1.3E7 | 5.4E6 | <b>8.2E6</b> | 0.026 | <b>-1.9</b> |

|            |                                                     |            |       |       |       |              |       |       |       |       |       |              |       |             |
|------------|-----------------------------------------------------|------------|-------|-------|-------|--------------|-------|-------|-------|-------|-------|--------------|-------|-------------|
| Q6S3A0     | Plectin                                             | Q6s3a0     | 5.1E7 | 5.0E7 | 3.0E7 | <b>4.4E7</b> | 2.8E7 | 2.2E7 | 1.7E7 | 3.0E7 | 1.6E7 | <b>2.3E7</b> | 0.016 | <b>-1.9</b> |
| P30427     | Plectin                                             | Plec       | 5.1E7 | 5.0E7 | 3.0E7 | <b>4.4E7</b> | 2.8E7 | 2.2E7 | 1.7E7 | 3.0E7 | 1.6E7 | <b>2.3E7</b> | 0.016 | <b>-1.9</b> |
| Q68FR9     | Elongation factor 1-delta                           | Ef1d       | 1.6E7 | 2.4E7 | 1.8E7 | <b>1.9E7</b> | 1.5E7 | 8.3E6 | 8.6E6 | 1.3E7 | 5.9E6 | <b>1.0E7</b> | 0.014 | <b>-1.9</b> |
| P62250     | 40S ribosomal protein S16                           | Rs16       | 2.9E7 | 2.7E7 | 1.2E7 | <b>2.3E7</b> | 1.5E7 | 1.2E7 | 1.2E7 | 1.2E7 | 6.5E6 | <b>1.2E7</b> | 0.049 | <b>-1.9</b> |
| Q0QEW8     | Ribosomal protein L18 (Fragment)                    | Q0qew8     | 4.2E7 | 3.8E7 | 1.9E7 | <b>3.3E7</b> | 1.7E7 | 2.1E7 | 1.8E7 | 2.1E7 | 8.9E6 | <b>1.7E7</b> | 0.038 | <b>-1.9</b> |
| A0A0G2KA35 | Uncharacterized protein                             | A0a0g2ka35 | 7.2E7 | 7.6E7 | 4.9E7 | <b>6.6E7</b> | 2.8E7 | 3.1E7 | 3.8E7 | 6.0E7 | 1.3E7 | <b>3.4E7</b> | 0.038 | <b>-1.9</b> |
| D4A6W6     | Similar to 60S ribosomal protein L8                 | D4a6w6     | 3.0E7 | 3.0E7 | 1.6E7 | <b>2.6E7</b> | 1.3E7 | 1.3E7 | 1.1E7 | 2.3E7 | 5.9E6 | <b>1.3E7</b> | 0.044 | <b>-2.0</b> |
| P05964     | Protein S100-A6                                     | S10a6      | 1.4E8 | 1.6E8 | 8.3E7 | <b>1.3E8</b> | 6.7E7 | 6.0E7 | 6.2E7 | 9.0E7 | 4.6E7 | <b>6.5E7</b> | 0.020 | <b>-2.0</b> |
| G3V8L3     | Lamin A, isoform CRA_b                              | G3v8l3     | 3.6E8 | 4.1E8 | 2.1E8 | <b>3.3E8</b> | 1.5E8 | 1.5E8 | 1.6E8 | 2.5E8 | 1.2E8 | <b>1.7E8</b> | 0.024 | <b>-2.0</b> |
| P63018     | Heat shock cognate 71 kDa protein                   | Hsp7c      | 1.4E8 | 1.6E8 | 6.8E7 | <b>1.2E8</b> | 4.9E7 | 5.4E7 | 6.5E7 | 9.2E7 | 3.9E7 | <b>6.0E7</b> | 0.040 | <b>-2.0</b> |
| A0A0G2JY31 | Alpha-1-antiproteinase                              | A0a0g2jy31 | 6.5E7 | 5.6E7 | 3.1E7 | <b>5.1E7</b> | 2.8E7 | 2.2E7 | 2.6E7 | 4.1E7 | 9.7E6 | <b>2.5E7</b> | 0.046 | <b>-2.0</b> |
| B2RZ72     | Actin-related protein 2/3 complex subunit 4         | B2rz72     | 2.0E7 | 1.7E7 | 1.0E7 | <b>1.6E7</b> | 7.6E6 | 8.3E6 | 7.5E6 | 1.0E7 | 5.0E6 | <b>7.7E6</b> | 0.016 | <b>-2.0</b> |
| Q66X93     | Staphylococcal nuclease domain-containing protein 1 | Snd1       | 2.3E7 | 1.9E7 | 1.4E7 | <b>1.9E7</b> | 9.3E6 | 1.1E7 | 7.4E6 | 1.4E7 | 3.4E6 | <b>9.2E6</b> | 0.025 | <b>-2.0</b> |
| A0A0G2JZH3 | Thrombospondin 3                                    | A0a0g2jzh3 | 5.8E7 | 5.2E7 | 6.4E7 | <b>5.8E7</b> | 2.3E7 | 3.4E7 | 2.0E7 | 4.7E7 | 1.7E7 | <b>2.8E7</b> | 0.009 | <b>-2.1</b> |
| A0A0G2JWX4 | Keratin, type II cytoskeletal 2 epidermal           | A0a0g2jwx4 | 3.5E7 | 2.1E7 | 1.9E7 | <b>2.5E7</b> | 1.8E7 | 1.7E7 | 1.3E7 | 3.9E6 | 9.5E6 | <b>1.2E7</b> | 0.045 | <b>-2.1</b> |
| Q6PDV8     | RCG31311                                            | Q6pdv8     | 3.0E7 | 4.1E7 | 1.6E7 | <b>2.9E7</b> | 1.6E7 | 1.0E7 | 1.7E7 | 1.7E7 | 8.6E6 | <b>1.4E7</b> | 0.042 | <b>-2.1</b> |
| I6L9G5     | Rcn3 protein                                        | I6l9g5     | 1.9E7 | 2.3E7 | 1.2E7 | <b>1.8E7</b> | 9.2E6 | 6.9E6 | 7.5E6 | 1.6E7 | 3.8E6 | <b>8.6E6</b> | 0.032 | <b>-2.1</b> |
| Q05175     | Brain acid soluble protein 1                        | Basp1      | 5.0E6 | 7.5E6 | 3.9E6 | <b>5.5E6</b> | 2.3E6 | 2.1E6 | 4.3E6 | 2.9E6 | 1.2E6 | <b>2.6E6</b> | 0.031 | <b>-2.1</b> |
| F1LW91     | Nuclear mitotic apparatus protein 1                 | F1lw91     | 3.1E6 | 2.4E6 | 2.5E6 | <b>2.7E6</b> | 9.8E5 | 1.1E6 | 2.5E6 | 1.4E6 | 1.9E5 | <b>1.2E6</b> | 0.035 | <b>-2.1</b> |
| M0RA79     | Uncharacterized LOC691828                           | M0ra79     | 1.0E8 | 9.3E7 | 1.0E8 | <b>1.0E8</b> | 4.7E7 | 3.4E7 | 5.7E7 | 6.7E7 | 2.8E7 | <b>4.7E7</b> | 0.002 | <b>-2.1</b> |
| P08289     | Alkaline phosphatase, tissue-nonspecific isozyme    | Ppbt       | 4.7E7 | 5.1E7 | 2.8E7 | <b>4.2E7</b> | 2.2E7 | 1.6E7 | 2.9E7 | 1.9E7 | 1.1E7 | <b>1.9E7</b> | 0.012 | <b>-2.2</b> |
| D3Z9E1     | Elastin microfibril interfacier 1                   | D3z9e1     | 1.7E7 | 1.7E7 | 8.0E6 | <b>1.4E7</b> | 3.9E6 | 7.3E6 | 8.4E6 | 7.4E6 | 4.8E6 | <b>6.3E6</b> | 0.022 | <b>-2.2</b> |
| P85845     | Fascin                                              | Fscn1      | 1.2E7 | 1.1E7 | 9.5E6 | <b>1.1E7</b> | 6.7E6 | 7.0E6 | 5.2E6 | 5.1E6 | 0.0E0 | <b>4.8E6</b> | 0.015 | <b>-2.2</b> |
| A0A0G2JST3 | Keratin, type II cytoskeletal 1                     | A0a0g2jst3 | 1.2E8 | 1.4E8 | 6.8E7 | <b>1.1E8</b> | 1.3E7 | 5.0E7 | 8.8E7 | 4.2E7 | 5.2E7 | <b>4.9E7</b> | 0.036 | <b>-2.2</b> |
| G3V7U4     | Lamin-B1                                            | G3v7u4     | 7.8E7 | 6.9E7 | 4.3E7 | <b>6.4E7</b> | 2.1E7 | 2.6E7 | 2.9E7 | 4.9E7 | 1.7E7 | <b>2.8E7</b> | 0.016 | <b>-2.2</b> |

|            |                                                  |            |       |       |       |              |       |       |       |       |       |              |        |             |
|------------|--------------------------------------------------|------------|-------|-------|-------|--------------|-------|-------|-------|-------|-------|--------------|--------|-------------|
| D3ZK97     | Histone H3                                       | D3zk97     | 2.1E8 | 2.3E8 | 4.2E8 | <b>2.9E8</b> | 1.6E8 | 2.0E8 | 1.2E8 | 1.2E8 | 2.2E7 | <b>1.2E8</b> | 0.046  | <b>-2.3</b> |
| A0A0G2K9Q9 | Keratin, type I cytoskeletal 17                  | A0a0g2k9q9 | 3.2E7 | 3.6E7 | 1.5E7 | <b>2.8E7</b> | 1.4E7 | 8.7E6 | 1.6E7 | 1.7E7 | 4.3E6 | <b>1.2E7</b> | 0.036  | <b>-2.3</b> |
| A0A0G2KAM4 | Fascin                                           | A0a0g2kam4 | 1.2E7 | 1.1E7 | 9.5E6 | <b>1.1E7</b> | 6.6E6 | 7.0E6 | 4.3E6 | 5.1E6 | 0.0E0 | <b>4.6E6</b> | 0.012  | <b>-2.3</b> |
| Q6LED0     | Histone H3.1                                     | H31        | 2.1E8 | 2.0E8 | 4.2E8 | <b>2.8E8</b> | 1.5E8 | 1.9E8 | 1.2E8 | 1.2E8 | 2.2E7 | <b>1.2E8</b> | 0.049  | <b>-2.3</b> |
| D3ZJ08     | Histone H3                                       | D3zj08     | 2.4E8 | 2.2E8 | 4.2E8 | <b>3.0E8</b> | 1.6E8 | 1.9E8 | 1.2E8 | 1.2E8 | 2.0E7 | <b>1.2E8</b> | 0.029  | <b>-2.4</b> |
| F1M013     | 60S ribosomal protein L7a                        | F1m013     | 3.3E7 | 3.2E7 | 2.2E7 | <b>2.9E7</b> | 1.4E7 | 1.1E7 | 3.9E6 | 1.8E7 | 1.2E7 | <b>1.2E7</b> | 0.005  | <b>-2.5</b> |
| D3ZKU5     | Similar to ribosomal protein L31                 | D3zku5     | 2.7E7 | 1.8E7 | 1.5E7 | <b>2.0E7</b> | 6.4E6 | 1.1E7 | 1.0E7 | 5.1E6 | 6.4E6 | <b>7.8E6</b> | 0.007  | <b>-2.6</b> |
| F1LV13     | Heterogeneous nuclear ribonucleoprotein M        | F1lv13     | 1.4E7 | 1.6E7 | 8.2E6 | <b>1.3E7</b> | 4.1E6 | 4.3E6 | 3.8E6 | 9.1E6 | 3.1E6 | <b>4.9E6</b> | 0.012  | <b>-2.6</b> |
| Q6IFV4     | Keratin, type I cytoskeletal 13                  | K1c13      | 3.6E7 | 3.9E7 | 2.1E7 | <b>3.2E7</b> | 1.3E7 | 8.5E6 | 1.8E7 | 1.7E7 | 4.9E6 | <b>1.2E7</b> | 0.010  | <b>-2.6</b> |
| F1LQ14     | 60S ribosomal protein L34                        | F1lq14     | 1.6E7 | 1.9E7 | 1.3E7 | <b>1.6E7</b> | 5.5E6 | 5.5E6 | 6.0E6 | 1.3E7 | 0.0E0 | <b>6.0E6</b> | 0.017  | <b>-2.6</b> |
| D3ZBN0     | Histone H1.5                                     | H15        | 4.2E7 | 4.5E7 | 3.2E7 | <b>4.0E7</b> | 9.3E6 | 1.4E7 | 1.3E7 | 2.7E7 | 7.3E6 | <b>1.4E7</b> | 0.004  | <b>-2.8</b> |
| G3V9R8     | Heterogeneous nuclear ribonucleoprotein C        | Hnrpc      | 1.2E7 | 4.9E6 | 6.2E6 | <b>7.7E6</b> | 4.6E6 | 3.0E6 | 0.0E0 | 4.1E6 | 2.1E6 | <b>2.7E6</b> | 0.042  | <b>-2.8</b> |
| P02793     | Ferritin light chain 1                           | Fril1      | 7.7E7 | 7.6E7 | 3.1E7 | <b>6.1E7</b> | 3.6E7 | 2.7E7 | 1.1E7 | 2.3E7 | 8.9E6 | <b>2.1E7</b> | 0.020  | <b>-2.9</b> |
| A0A0G2JZS9 | Uncharacterized protein                          | A0a0g2jzs9 | 7.8E7 | 4.2E7 | 7.4E7 | <b>6.5E7</b> | 0.0E0 | 2.4E7 | 3.1E7 | 3.4E7 | 1.5E7 | <b>2.1E7</b> | 0.009  | <b>-3.1</b> |
| O35244     | Peroxiredoxin-6                                  | Prdx6      | 1.1E7 | 1.2E7 | 7.0E6 | <b>9.9E6</b> | 6.3E6 | 0.0E0 | 4.8E6 | 4.2E6 | 0.0E0 | <b>3.1E6</b> | 0.015  | <b>-3.2</b> |
| A0A096MJE0 | Keratin 32 (Fragment)                            | A0a096mje0 | 8.1E7 | 7.5E7 | 3.2E7 | <b>6.3E7</b> | 2.0E7 | 1.7E7 | 4.2E7 | 1.7E7 | 0.0E0 | <b>1.9E7</b> | 0.022  | <b>-3.3</b> |
| A0A0H2UHU0 | 40S ribosomal protein S25                        | A0a0h2uhu0 | 2.9E7 | 2.3E7 | 1.1E7 | <b>2.1E7</b> | 1.0E7 | 0.0E0 | 4.7E6 | 1.4E7 | 3.3E6 | <b>6.4E6</b> | 0.026  | <b>-3.3</b> |
| Q6IFU9     | Keratin 16                                       | Q6ifu9     | 7.7E7 | 6.9E7 | 7.9E7 | <b>7.5E7</b> | 1.9E7 | 1.1E7 | 3.1E7 | 3.1E7 | 1.6E7 | <b>2.2E7</b> | 0.0001 | <b>-3.5</b> |
| Q5RKG9     | Eukaryotic translation initiation factor 4B      | Q5rk9      | 7.8E5 | 1.4E6 | 8.1E5 | <b>1.0E6</b> | 3.5E5 | 5.2E5 | 0.0E0 | 5.4E5 | 0.0E0 | <b>2.8E5</b> | 0.018  | <b>-3.6</b> |
| A0A0G2K531 | Glutathione peroxidase                           | A0a0g2k531 | 2.7E7 | 1.2E7 | 1.4E7 | <b>1.8E7</b> | 1.1E7 | 8.3E6 | 0.0E0 | 0.0E0 | 4.8E6 | <b>4.7E6</b> | 0.027  | <b>-3.7</b> |
| D3ZZN4     | Uncharacterized protein                          | D3zzn4     | 1.3E7 | 1.4E7 | 9.4E6 | <b>1.2E7</b> | 5.7E6 | 0.0E0 | 8.4E6 | 0.0E0 | 1.8E6 | <b>3.2E6</b> | 0.010  | <b>-3.9</b> |
| A0A0G2JSL0 | Proteasome subunit beta type                     | A0a0g2jsl0 | 1.1E7 | 1.4E7 | 6.5E6 | <b>1.0E7</b> | 5.0E6 | 4.6E6 | 0.0E0 | 0.0E0 | 3.0E6 | <b>2.5E6</b> | 0.009  | <b>-4.1</b> |
| P52296     | Importin subunit beta-1                          | lmb1       | 1.2E7 | 1.0E7 | 6.3E6 | <b>9.6E6</b> | 5.3E6 | 0.0E0 | 0.0E0 | 2.6E6 | 3.2E6 | <b>2.2E6</b> | 0.007  | <b>-4.3</b> |
| B5DF91     | ELAV-like protein 1                              | Elav1      | 1.0E7 | 9.9E6 | 3.9E6 | <b>7.9E6</b> | 0.0E0 | 0.0E0 | 3.1E6 | 5.4E6 | 0.0E0 | <b>1.7E6</b> | 0.025  | <b>-4.6</b> |
| D4ABT8     | Heterogeneous nuclear ribonucleoprotein U-like 2 | D4abt8     | 2.5E6 | 3.3E6 | 1.7E6 | <b>2.5E6</b> | 0.0E0 | 0.0E0 | 1.1E6 | 1.5E6 | 0.0E0 | <b>5.3E5</b> | 0.013  | <b>-4.7</b> |

|            |                                                            |            |       |       |       |              |       |       |       |       |       |              |       |               |
|------------|------------------------------------------------------------|------------|-------|-------|-------|--------------|-------|-------|-------|-------|-------|--------------|-------|---------------|
| D3Z9G3     | Uncharacterized protein                                    | D3z9g3     | 5.1E7 | 6.4E7 | 2.6E7 | <b>4.7E7</b> | 1.9E7 | 2.2E7 | 0.0E0 | 8.6E6 | 0.0E0 | <b>9.9E6</b> | 0.012 | <b>-4.7</b>   |
| G3V9T1     | Cysteine-rich secretory protein LCCL domain-containing 2   | G3v9t1     | 4.8E6 | 4.8E6 | 2.4E6 | <b>4.0E6</b> | 2.3E6 | 0.0E0 | 1.9E6 | 0.0E0 | 0.0E0 | <b>8.5E5</b> | 0.013 | <b>-4.7</b>   |
| P62083     | 40S ribosomal protein S7                                   | Rs7        | 2.4E7 | 3.6E7 | 7.1E6 | <b>2.2E7</b> | 9.9E6 | 8.0E6 | 0.0E0 | 4.9E6 | 0.0E0 | <b>4.6E6</b> | 0.037 | <b>-4.9</b>   |
| D3ZN79     | Similar to 60S ribosomal protein L35                       | D3zn79     | 3.7E7 | 5.0E7 | 2.3E7 | <b>3.7E7</b> | 1.5E7 | 1.8E7 | 0.0E0 | 0.0E0 | 2.9E6 | <b>7.2E6</b> | 0.009 | <b>-5.1</b>   |
| A0A0G2K9X1 | Secreted phosphoprotein 24                                 | A0a0g2k9x1 | 1.4E7 | 1.8E7 | 4.4E6 | <b>1.2E7</b> | 0.0E0 | 8.8E6 | 0.0E0 | 2.5E6 | 0.0E0 | <b>2.3E6</b> | 0.038 | <b>-5.3</b>   |
| B2RYQ2     | Serine/threonine-protein phosphatase 2A activator          | B2ryq2     | 2.9E6 | 4.5E6 | 3.0E6 | <b>3.5E6</b> | 0.0E0 | 0.0E0 | 0.0E0 | 3.0E6 | 0.0E0 | <b>6.0E5</b> | 0.017 | <b>-5.8</b>   |
| D4A0L4     | Y-box-binding protein 3                                    | D4a0l4     | 5.6E6 | 4.6E6 | 8.8E6 | <b>6.4E6</b> | 0.0E0 | 1.9E6 | 0.0E0 | 3.5E6 | 0.0E0 | <b>1.1E6</b> | 0.007 | <b>-5.8</b>   |
| G3V6S1     | PRKC apoptosis WT1 regulator protein                       | G3v6s1     | 2.9E6 | 3.5E6 | 1.6E6 | <b>2.7E6</b> | 9.2E5 | 0.0E0 | 1.3E6 | 0.0E0 | 0.0E0 | <b>4.5E5</b> | 0.007 | <b>-6.0</b>   |
| G3V6P6     | RNA binding motif protein 3, isoform CRA_a                 | G3v6p6     | 3.4E7 | 2.8E7 | 1.8E7 | <b>2.7E7</b> | 1.2E7 | 0.0E0 | 0.0E0 | 8.7E6 | 0.0E0 | <b>4.2E6</b> | 0.004 | <b>-6.4</b>   |
| D3ZFY8     | Ubiquitin-conjugating enzyme E2 variant 1-like             | D3zfy8     | 8.3E6 | 9.6E6 | 2.3E6 | <b>6.7E6</b> | 5.8E5 | 0.0E0 | 0.0E0 | 3.7E6 | 0.0E0 | <b>8.6E5</b> | 0.022 | <b>-7.8</b>   |
| F1LPR6     | Immunoglobulin heavy constant mu                           | F1lpr6     | 1.5E7 | 1.6E7 | 2.5E7 | <b>1.9E7</b> | 3.0E6 | 0.0E0 | 0.0E0 | 4.9E6 | 2.7E6 | <b>2.1E6</b> | 0.001 | <b>-8.9</b>   |
| Q6AZ26     | C-terminal binding protein 1                               | Q6az26     | 3.6E6 | 2.4E6 | 2.0E6 | <b>2.7E6</b> | 1.4E6 | 0.0E0 | 0.0E0 | 0.0E0 | 0.0E0 | <b>2.7E5</b> | 0.003 | <b>-9.9</b>   |
| P62275     | 40S ribosomal protein S29                                  | Rs29       | 8.6E6 | 7.7E6 | 3.5E6 | <b>6.6E6</b> | 3.2E6 | 0.0E0 | 0.0E0 | 0.0E0 | 0.0E0 | <b>6.3E5</b> | 0.006 | <b>-10.4</b>  |
| B5DF03     | Peptidylprolyl isomerase (Fragment)                        | B5df03     | 3.2E6 | 4.1E6 | 1.9E6 | <b>3.1E6</b> | 0.0E0 | 0.0E0 | 1.5E6 | 0.0E0 | 0.0E0 | <b>2.9E5</b> | 0.004 | <b>-10.5</b>  |
| B0BNA7     | Eukaryotic translation initiation factor 3 subunit I       | Eif3i      | 3.0E6 | 3.9E6 | 2.0E6 | <b>3.0E6</b> | 0.0E0 | 1.4E6 | 0.0E0 | 0.0E0 | 0.0E0 | <b>2.8E5</b> | 0.003 | <b>-10.7</b>  |
| Q5XIC1     | Mannose-1-phosphate guanyltransferase alpha                | Gmppa      | 2.3E6 | 3.5E6 | 0.0E0 | <b>1.9E6</b> | 0.0E0 | 0.0E0 | 0.0E0 | 0.0E0 | 0.0E0 | <b>0.0E0</b> | 0.043 | <b>-1.9E6</b> |
| B2RZA9     | Ube2l3 protein                                             | B2rza9     | 5.0E6 | 4.3E6 | 0.0E0 | <b>3.1E6</b> | 0.0E0 | 0.0E0 | 0.0E0 | 0.0E0 | 0.0E0 | <b>0.0E0</b> | 0.035 | <b>-3.1E6</b> |
| A0A140TAA4 | Programmed cell death 6-interacting protein                | A0a140taa4 | 3.9E6 | 4.3E6 | 2.1E6 | <b>3.4E6</b> | 0.0E0 | 0.0E0 | 0.0E0 | 0.0E0 | 0.0E0 | <b>0.0E0</b> | 0.001 | <b>-3.4E6</b> |
| M0RD20     | Calpain small subunit 1                                    | M0rd20     | 5.6E6 | 5.0E6 | 0.0E0 | <b>3.5E6</b> | 0.0E0 | 0.0E0 | 0.0E0 | 0.0E0 | 0.0E0 | <b>0.0E0</b> | 0.034 | <b>-3.5E6</b> |
| Q63002     | Mannose 6-phosphate/insulin-like growth factor II receptor | Q63002     | 5.4E6 | 5.2E6 | 0.0E0 | <b>3.5E6</b> | 0.0E0 | 0.0E0 | 0.0E0 | 0.0E0 | 0.0E0 | <b>0.0E0</b> | 0.034 | <b>-3.5E6</b> |
| Q4KM65     | Cleavage and polyadenylation specificity factor subunit 5  | Cpsf5      | 6.7E6 | 5.7E6 | 0.0E0 | <b>4.1E6</b> | 0.0E0 | 0.0E0 | 0.0E0 | 0.0E0 | 0.0E0 | <b>0.0E0</b> | 0.035 | <b>-4.1E6</b> |
